# Supplementary material
Source: HighWire-hosted journal article supplement (http://bmjopenquality.bmj.com/highwire/filestream/136206/field_highwire_adjunct_files/0/ds5096.docx)
Supplement: ds5096.docx [file ds5096.docx]

**Table 1: Statistical Significance of Total Testing Offered, Per Month**

| **Month** | **Testing Offered** | **Significance (p-value)** |
| --- | --- | --- |
| **December 2013** | 570/1207 | XXXX |
| **January 2014** | 586/1253 | 0.85 |
| **May 2014** | 755/1344 | 0.000008 |
| **June 2014** | 756/1406 | 0.0009 |
| **July 2014** | 780/1372 | 0.000001 |
| **August 2014** | 827/1402 | 0.000000002 |
| **September 2014** | 756/1365 | 0.0008 |
| **October 2014** | 706/1458 | 0.56 |
| **November 2014** | 694/1294 | 0.0015 |
| **December 2014** | 898/1320 | <0.00000001 |
| **January 2015** | 1129/1299 | <0.0000001 |
| **February 2015** | 1094/1245 | <0.0000001 |

**Chart 1: Percentage of Total Testing Offered, Per Month**

**Table 2: Statistical Significance Incidence of Newly Diagnosed of Tested, Per Month**

| **Month** | **Incidence of Newly Diagnosed of Tested** | **Significance (p-value)** |
| --- | --- | --- |
| **December 2013** | 9/570 | XXXX |
| **January 2014** | 10/586 | 0.99 |
| **May 2014** | 21/755 | 0.2 |
| **June 2014** | 30/765 | 0.019 |
| **July 2014** | 29/780 | 0.029 |
| **August 2014** | 29/826 | 0.044 |
| **September 2014** | 34/756 | 0.0049 |
| **October 2014** | 35/706 | 0.0017 |
| **November 2014** | 29/694 | 0.011 |
| **December 2014** | 36/898 | 0.013 |
| **January 2015** | 39/1129 | 0.0401 |
| **February 2015** | 34/1094 | 0.0886 |
